# Supplementary material for: Low‐ω3 Fatty Acid and Soy Protein Attenuate Alcohol‐Induced Fatty Liver and Injury by Regulating the Opposing Lipid Oxidation and Lipogenic Signaling Pathways
Source: Hindawi journal article supplement (doi:10.1155/2016/1840513), 2016-01-01
Supplement: f1 [file 1840513.f1.pdf]

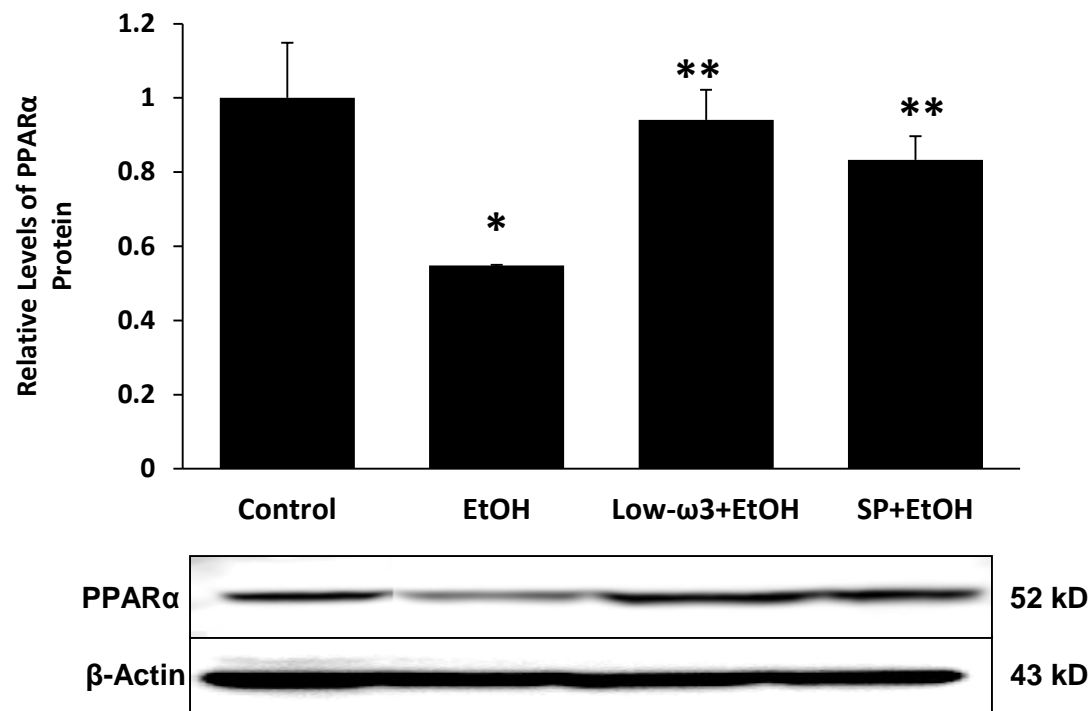

**SUPPLEMENTAL TABLE****Supplemental Table 1: Rat RT-PCR Primer Sequences**

| Gene           | Primer Sequence |                                  |
|----------------|-----------------|----------------------------------|
| PGC1 $\beta$   | Forward         | 5' – ctggctcctcatcctgtagc – 3'   |
|                | Reverse         | 5' – ccggagagatttcggatgta – 3'   |
| SREBP1c        | Forward         | 5' – ggagccatggattgcacatt – 3'   |
|                | Reverse         | 5' – aggaaggcttcagagagga – 3'    |
| cMet           | Forward         | 5' – cgacattcagtcagaggttca – 3'  |
|                | Reverse         | 5' – gggacactggcctgactcttc – 3'  |
| ACC            | Forward         | 5' – gcctcttcctgacaaacgag – 3'   |
|                | Reverse         | 5' – gccgaaacatctctctgggata – 3' |
| SIRT1          | Forward         | 5' – ccttcagaaccaccaaagc – 3'    |
|                | Reverse         | 5' – acagcaaggcagcataaat – 3'    |
| PGC1 $\alpha$  | Forward         | 5' – aacaagcacttcggtcatcc – 3'   |
|                | Reverse         | 5' – agagcaagaaggcgacacat – 3'   |
| CPT1           | Forward         | 5' – gtgaagcctttgggtggata – 3'   |
|                | Reverse         | 5' – cagggtctcactcctcttgc – 3'   |
| $\beta$ -Actin | Forward         | 5' – cagggtctcactcctcttgc – 3'   |
|                | Reverse         | 5' – cagggtctcactcctcttgc – 3'   |
